# Supplementary material
Source: Research Square preprint supplement (doi:10.21203/rs.3.rs-10110355/v1)
Supplement: Supplementary file 1 [file 437cbd54832ceb2c0deb947a.docx]

**Appendix**

**Table 2: Literature review of related articles on telemedicine and Sickle Cell Disease**

| **sn** | **Name of Author (s)** | | **Title** | **Objectives** | **Methods** | **Result** | **Gab Analysis** |
| --- | --- | --- | --- | --- | --- | --- | --- |
| 1 | | Rashwan et al (2024) | Effect of empowerment-based interventions on self-efficacy and selfcare capacity among patients with sickle cell disease: A randomized controlled trial | The purpose of this study was to look into the effectiveness of empowerment-based interventions in improving self-care capability among adults with sickle cell disease (SCD). | Observational and Qualitative | Empowerment-based intervention employing the 5As paradigm enhances self-efficacy and self-care capacity among patients with SCD. | Using telemedicine or telecare tools may enhance self-care-efficacy |
| 2 | | Goswami et al., (2024) India | Detecting sickle cell sickness with deep neural networks and understandable artificial intelligence | Using transfer learning to locate sickle cells from tiny pictures of peripheral blood smears.  Comparing the results and performance of three different sickle cell identification algorithms, including GoogLeNet, ResNet-18, and ResNet-50.  Furthermore, XAI is utilized to clarify deep learning models. Grad-CAM was utilized to make the forecasts clear and intelligible. | Transfer Learning The use of GoogLeNet, ResNet-18, and ResNet-50 convolutional neural network (CNN) architectures for image classification of blood smear. | This paper presented a deep learning strategy for detecting sickle cells in blood smears and classifying them using three distinct networks. When comparing the three models (GoogLeNet, ResNet18, and ResNet50), ResNet50 achieved the maximum accuracy of 94.90%. To understand the predictions, a XAI approach called Grad-CAM was used. This promotes transparency and understanding of outcomes. | Study proves AI can be adopted in SCD Diagnosis but doesn’t not explore on practical ways it can be used in telemedicine for either self testing, point of care testing or lab usage in the developing world. |
| 3 | | Ganapathy et al., (2021) INDIA | Telegenomics: Relevance in India | This paper aims to highlight that whatever can be accomplished in a direct face-to-face consultation can be achieved in a virtual session. | Qualitative | Identifying probands, and informing relatives directly, using phone-based counselling tools, in families with a strong germline predisposition for cancer is doable. | Genetic Counselling could be conducted through telehealth for Sickle Disease. |
| 4 | | Nlemadim et al., (2021) NIGERIA | Telemedicine for Children with Sickle cell Anaemia in a Resource-Poor Setting during COVID-19 Pandemic | The aim of this study was to assess the clinical experience in the use of mobile health telemedicine for the care of children with SCA. | Qualitative; : An Observational Study | Mobile health telemedicine is a beneficial tool in the maintenance of care and possibly prevention of SARS-CoV-2 infection among children with SCA in a resource-limited region. Efforts should be made by stakeholders to institute and promulgate telemedicine during this pandemic | Their focus was only on resource limited facilities. leaving the post pandemic era. |
| 5 | | Alturaiki, et al., (2020) SAUDI ARABIA | A Smart Chatbot for Interactive Management in Beta Thalassemia Patients | This study aims to develop a chatbot that can assist in the management of ß-thalassemia by providing the assessment information required to monitor patients’ statuses | Experimental | The findings suggest that chatbots can be beneficial to the development of recommended tests and management related to the assessment of ß-thalassemia | This study had a very small sample size of 34 patients. It could be further expanded to cater for other sickle types aside Beta Thalassemia. Moreover, the study didn’t specify the age range of its users. A chatbot for paediatric caregivers can be explored. |
| 6 | | Chitungo et al., (2021) Sub Saharan Africa | Utility of telemedicine in sub-Saharan Africa during the COVID-19 pandemic. A rapid review | Identify telemedicine technologies used to improve care in diverse application domains in Sub-Saharan Africa during the epidemic. • Examine the success and implementation issues faced by Sub-Saharan African countries in implementing telemedicine technology during the pandemic. • Develop policy proposals to overcome implementation hurdles and Challenges |  | Our findings highlight the relevance of telemedicine during the COVID-19 epidemic; yet, it has been limited by a variety of constraints, including a lack of financial assistance, internet infrastructure education, and public awareness. It also discusses the current obstacles and gives answers for how telemedicine can be completely adopted and deployed to bridge the distance gap between patients and service providers, particularly during the ongoing pandemic. | This article focused mainly on the period of the COVID-19 Pandemic. A post pandemic review would be in order. Moreover, another area this review could have focused was data for posterity. How information generated from telemedicine tools. -Interoperability of telemedicine tools with national registries and existing ehealth systems |
| 7 | | Obeagu et al., (2023) UGANDA | Harnessing Technology for Effective Sickle Cell Disease Awareness Among Ugandan Adolescents: A Review | This review examines the role of technology in enhancing SCD awareness, with a focus on mobile applications, social media, telemedicine, and educational games. | Observational | Through an in-depth exploration of mobile applications, social media, telemedicine, and educational games, this review highlights the potential of technology-driven interventions in addressing the unique challenges associated with SCD in Uganda | This review could not note data management in Telehealth; data ownership, storage, interoperability with other softwares, accessibility and data security. |
| 8 | | Treadwel et al., (2024),USA | Tracking Telehealth Needs for Individuals With Sickle Cell Disease Through the COVID‐19 Pandemic | We aimed to evaluate telehealth experiences and satisfaction for routine visits among adults and caregivers of children with SCD within a US regional collaborative. | qualitatively analysed, : A Cross‐Sectional Survey Study | A study on telehealth for Sickle Cell Disease (SCD) management during the COVID-19 pandemic found:  - High satisfaction rates among patients and caregivers  - Effective care management and increased accessibility  - Need for support in smaller healthcare centers and for non-English speaking populations  - Preference for a mix of in-person and telehealth visits  - Policy implications: continued support for telehealth and addressing disparities in access. | The focus on larger canter leaving the rural areas |
| 9 | | Shaner et al., (2021),USA | Impact of telehealth visits on hydroxyurea response in sickle cell anaemia | This study evaluated the impact of telehealth dosing adjustments on hydroxyurea (HU) laboratory and clinical response as compared with university-based patients | A one-year retrospective chart review | The use of telehealth did not negatively impact laboratory response to HU. | should identify novel approaches to improve access to HU among patients with SCA living in rural areas.  The study does not explore long-term adherence to hydroxyurea after telehealth interventions. |
| 10 | | Hood et al., (2021), USA | Mobile health use predicts self-efficacy and self-management in adolescents with sickle cell disease | We integrated a mobile app as an adjunct to a group intervention and hypothesized that more engagement with the mHealth app would increase self-management and self-efficacy for adolescents and young adults (AYA) with SCD | Quantitative | 1, study findings indicate that it can be challenging to maintain engagement in mHealth for AYA with SCD, but for those who do engage, there are significant benefits related to self-management, self-efficacy, and managing pain and mood. Effectively 2 findings indicate that an adjunct mHealth app can be integrated into a clinical trial and is related to positive outcomes | The study acknowledges low engagement rates with mobile health (mHealth) apps but does not investigate factors influencing low adoption (e.g., usability, digital literacy, socioeconomic barriers). Future research should address strategies to enhance sustained engagement |
| 11 | | Jacob et al., (2023), USA | Understanding caregiver burden with accessing sickle cell care in the Midwest and their perspective on telemedicine | The goal of this study is to learn about the experiences of caregivers of podiatric SCD patients in a geographically diverse location in the Midwest in terms of accessing care, as well as their attitudes toward telemedicine. | Qualitative survey | A survey of 101 caregivers of children with Sickle Cell Disease (SCD) revealed that 20% travel over an hour to reach the SCD center and that their children visit many healthcare providers (avg. 2+ besides the SCD physician).  - Financial and resource hurdles hinder care. - 25% of caregivers state that these barriers impact their child's mental health. - Ease of access to team members and scheduling improves care. - While most caregivers are willing to use telemedicine, some may need changes. | While the study highlights financial and resource-based barriers, it does not explore how telemedicine can address these challenges.. |
| 12 | | Jacob et al. (2022), USA | Caregivers' experiences with sickle cell care and the use of telemedicine | This study aims to increase understanding of barriers to care and perceptions of telemedicine by caregivers of paediatric SCD patients in a medically under-resourced area in the Midwest. | Qualitative | This qualitative study addresses common challenges faced by caregivers of SCD, barriers to and facilitators of SCD care in the Midwest, and caregiver perceptions of the usefulness and efficacy of telemedicine in SCD care. | The study lacks a comparison between caregivers who use telemedicine and those who do not. Understanding this difference could highlight telemedicine’s true impact on reducing caregiver burden. |
| 13 | | Stasher-Booker et al., (2021),  USA | The Use of Smartphone Technology to Improve the Health of Sickle Cell Patients | The study aimed to provide insights into the use of smartphone technology and its impact on improving the health of SCD patients | Literature analysis methodology. | Smartphones offer tools for pain monitoring, treatment reinforcement, and patient education. | Limited evidence-based research on smartphone applications for SCD management. |
| 14 | | Issom (2022), USA | Digital Health Interventions to Empower People with Sickle Cell Disease: Toward Patient-Led Design | Aimed at providing a holistic/planetary health approach that will be chosen to introduce the subject and ensure to keep a broad eye on the domain and to include sustainability challenges. | Review of digital health interventions using WHO classification. | Digital tools can improve self-management and address healthcare disparities. | Limited patient-led designs and challenges in tool adoption due to personalization issues. |
| 15 | | Badawy et al., (2020), USA | Digital Approaches to Remote Paediatric Health Care Delivery During the COVID-19 Pandemic | Addressing research areas that are essential to understanding the benefits, sustainability, safety, and optimization strategies of telemedicine and other digital approaches as key parts of modern health care delivery. | Review of digital interventions and evidence from telemedicine and mobile apps. | Improved paediatric access to care, though inequities and privacy challenges remain. | Calls for cost-effectiveness analysis and expanded health equity research. |
| 16 | | Murdaugh et al., (2021), USA | Cognitive and Behavioural Outcomes in Adolescents with Sickle Cell Disease Before and After a Telehealth Cognitive Remediation Program | The purpose of this study is to test the efficacy of an individualized cognitive remediation program designed to promote not just cognitive function, but also adaptive and self-management skills necessary for successful transition to independence | C-READY program with 8 telehealth sessions. | Significant improvements in cognitive and adaptive skills. | Need for larger-scale studies and addressing disparities in telehealth access. |
| 17 | | Shook et al., (2020)  USA | Leveraging Project Echo Telementoring to Improve Sickle Cell Disease Care in the Midwest | to increase provider knowledge about evidence-based management of SCD | STORM TeleECHO monthly virtual clinics using case discussions and forums. | Improved provider knowledge and confidence in managing SCD. | Expansion of tele-education to address underserved SCD populations needed. |
| 18 | | Badawy et al., (2022),  USA | Impact of the COVID-19 Pandemic on the Implementation of Mobile Health to Improve the Uptake of Hydroxyurea in Patients With Sickle Cell Disease | To evaluate the impact of COVID-19 on mobile health (mHealth) interventions for hydroxyurea adherence in sickle cell disease (SCD) | Mixed-methods study using the RE-AIM framework; quantitative analysis of app usage and medication adherence (PDC), and qualitative interviews with stakeholders | mHealth improved hydroxyurea adherence, but adherence dropped during COVID-19 lockdowns; site closures impacted results significantly | Further research needed on strategies to mitigate healthcare disruptions during emergencies and sustain intervention effectiveness |
| 19 | | Speller-Brown et al., (2023), USA | Telemedicine in Sickle cell disease: Patient, parent, and provider perspectives | to determine caregiver, patient, and healthcare provider (HCP) perspectives and satisfaction with telemedicine in healthcare delivery | Observational study: survey | Patients/caregivers rated satisfaction “ excellent” in the five areas (Usefulness, Ease of use, Effectiveness, Reliability, and Satisfaction). Also, HCP rated the five areas as good. No significant difference in satisfaction for Telemedicine and in-person visits (p> 0.05) | Further research needed for assessment of quality of care delivery through telemedicine among a larger population. |
| 20 | | Shannon et al., (2019), USA | An Approach to Revising mHealth Interventions for Children and Families: A Case Example in Sickle Cell Disease | 1. Present a step-by-step approach for revising mHealth interventions for child/parent dyads. 2. Introduce the Website Analysis and Measurement Inventory (WAMMI) as a coding framework for analysing qualitative data to gauge appeal and enhance engagement. | Qualitative study using semi-structured interviews and participant observation with child/parent dyads and healthcare providers to gather feedback on a pre-existing SCD self-management app. 2. Applied the WAMMI framework to analyse qualitative data related to appeal and engagement. | 1. The WAMMI analysis revealed that the app was generally well-received. 2. Key findings related to each WAMMI domain (attractiveness, controllability, efficiency, helpfulness) are detailed in the paper, including positive feedback and suggestions for improvement. 3. The article describes how the qualitative data was used to create a matrix of "critical" and "desirable" revisions. | The article identifies a gap in the mHealth literature regarding frameworks specifically designed for revising existing mHealth interventions for child/parent dyads. Existing frameworks primarily focus on development rather than revision. This gap is addressed by the proposed five-step approach. |
| 21 | | Hankins et al. (2023), USA | A multilevel mHealth intervention boosts adherence to hydroxyurea in individuals with sickle cell disease | To test the effectiveness of two mHealth interventions (InCharge Health for patients and HU Toolbox for providers) on improving hydroxyurea adherence in individuals with SCD. | A multi-center, non-randomized, closed cohort hybrid-effectiveness trial was conducted. | Mean PDC increased significantly from 39.7% at baseline to 56.0% during the intervention. This increase was sustained at 51.4% at 12 weeks post-intervention. The highest increases were seen in those with baseline PDC <80%. App use was associated with increased PDC. A reduction in hospital admissions for pain was observed in individuals with prior admissions. Provider use of HU Toolbox was low and did not impact PDC. | The article addresses the gap of low hydroxyurea adherence in SCD patients by developing and testing a tailored mHealth intervention. It highlights the need for interventions that address both patient behaviour and provider prescribing practices, although the provider-focused intervention was not successful. It also points out the need for a definitive randomized controlled trial to confirm these findings. |
| 22 | | Shannon et al., (2021)  USA | Feasibility of an mHealth self-management intervention for children and adolescents with sickle cell disease and their families | To assess the feasibility of the Voice Crisis Alert V2 for children with SCD and families. | Qualitative, observational | Mobile Application Rating Scale scores and interview data indicated high satisfaction. From baseline to mid-intervention, 94% of dyads used the application (75% of total use); 45% used the application from mid-intervention to the end-of-intervention. The most commonly used features were recording health history and recording and tracking symptoms. Feasibility was confirmed by meeting recruitment and retention goals, high adoption of the application, and high reported satisfaction with the application. | the study addressed gap in family-centered self-management and on interventions to reduce caregiver burden and improve interactions with health professionals. Utilized the feedback obtained from children and adolescents with SCD, parents/primary caregivers, and health care providers of affected children to develop and refine an mHealth application (app) to facilitate self-management behaviours in families of children with SCD |
| 23 | | Reeves et al., (2024) USA | Assessing Patterns of Telehealth Use Among People with Sickle Cell Disease Enrolled in Medicaid During the Start of the COVID-19 Pandemic | This study examined telehealth use, characteristics of telehealth use, and differences between telehealth users and nonusers among people with SCD during the COVID-19 pandemic. | Cross-sectional study | Telehealth use increased significantly at the beginning of the COVID-19 pandemic by people with SCD. | The study sought to answer questions regarding the use of telehealth among a broader population of people with SCD, including the frequency of use as well as characteristics of the telehealth use and users. |
| 24 | | Kenney et al., (2021)  USA | Telehealth acceptability and opioid prescribing patterns of providers of painful chronic diseases during the COVID-19 pandemic: A survey of sickle cell providers | This survey asks sickle cell providers about their experiences administering opioids during the COVID-19 pandemic and their shift to telehealth. | Quantitative Study | Despite a rise in telehealth utilization, the vast majority of respondents said that their opioid prescribing practices had not changed after COVID-19. Naloxone is only occasionally prescribed as a risk-reduction tactic. | Their focused was only on prescribers. It does not assess patient perspectives on telehealth and opioid prescribing. |
| 25 | | Pecker et al., (2020), USA | The Patient Should Have a Choice": Adults with Sickle Cell Disease (SCD)Advise Integration of Telemedicine into the Comprehensive Sickle Cell Disease Care Model | The purpose of this study was to elicit the perspectives of adults with SCD about their experience with telemedicine during the COVID-19 pandemic and to understand their preferences with respect to future telemedicine care. | qualitatively analyzed, : A Cross‐Sectional Survey | Participants contrasted telemedicine and in-person care using the following criteria: Time efficiency: Telemedicine was thought to be practical. Personal safety: Less COVID-19 exposure. Pain management: Telemedicine wasn't the best for handling urgent pain. Keeping up caring relationships: Some issues regarding the interaction between patients and providers. In contrast to urgent or crisis care, telemedicine was thought to be more effective for follow-up care. The expansion of telemedicine services to other specialties was desired by the participants. Privacy issues and the need for improved technical help were brought up.. | Small sample size (30 participants, 28 analyzed) limits generalizability. Further research is needed to explore long-term outcomes of telemedicine for SCD care |
| 26 | | Addotey-Delove et al., (2023) | Healthcare Workers’ Perspectives of mHealth Adoption Factors in the Developing World: Scoping Review | This study sought to report a scoping review of factors that impact the adoption of mHealth by healthcare workers in the developing world, and based on these findings, a framework is to be developed to enhance mHealth adoption by healthcare workers in the developing world. | A structured literature search performed using PubMed and Scopus, supplemented by hand searching | Application of the framework and accompanying subcategories will raise awareness of practical issues that must be addressed to ensure successful adoption of mHealth solutions for healthcare workers in the developing world. This will help shape future policy and practical approaches to mHealth implementation and use in the developing world for healthcare workers, thereby increasing adoption. | This study developed a very comprehensive Framework for mHealth adoption, but did not mention Data Transmission in the framework; relying on stable internet connectivity in the developing world. The framework does not include how mHealth Software will communicate or interoperate with existing ehealth systems. |
| 27 | | Amjad et al., (2023), | A Review on Innovation in Healthcare Sector (Telehealth) through Artificial Intelligence | This article is aimed to study different areas of telemedicine and analyse the effect of AI in the field of health and medicine | Systematic Literature Review (SLR) using PRISMA guidelines. | AI enhances telehealth through patient monitoring and diagnostic support. | Challenges in data standardization and ethical considerations. |
